# Supplementary material
Source: publisher figshare collection journal article supplement (https://frontiersin.figshare.com/ndownloader/files/15351080)
Supplement: Supplementary file [file 15351080]

# Appendix 1. Recent immigrants' health: between effects, by immigrant group

|                                   | Poles   | Bulgarian | Spaniards | Turks   |
|-----------------------------------|---------|-----------|-----------|---------|
| <b>Economic</b>                   |         |           |           |         |
| Employed                          | .09     | .01       | .14*      | .06     |
| Been unemployed last year         | -.02    | -.14      | .09       | .00     |
| Income                            |         |           |           |         |
| - Medium or high income           |         |           |           |         |
| - Low income                      | -.04    | .07       | .04       | -.13    |
| - No information on income        | -.13    | .12       | .10       | .01     |
| Fixed contract                    | -.03    | -.06      | -.01      | .14     |
| Irregular work                    | -.01    | .07       | -.03      | -.02    |
| Hazardous work                    | -.11**  | -.06      | .02       | .03     |
| Physical heavy work               | -.17*** | -.20**    | -.08*     | -.29*** |
| <b>Social</b>                     |         |           |           |         |
| Contact with co people            | .03*    | .06*      | .02       | -.01    |
| Contact with Dutch                | .02     | .03       | .02       | .06*    |
| Relevant and close person in NL   | .14*    | -.12      | .04       | .28     |
| Partner status                    |         |           |           |         |
| - No Partner (ref)                |         |           |           |         |
| - Partner in the household        | -.01    | .09       | .13*      | .09     |
| - Partner outside the household   | .01     | .05       | -.01      | .00     |
| Children in the household         | -.06    | -.05      | -.13~     | .06     |
| Children under 18 in CO           | -.01    | .04       | -.10      | .45~    |
| <b>Cultural</b>                   |         |           |           |         |
| Perceived group discrimination    | -.05*   | -.07~     | -.07**    | -.19*** |
| Perceived cultural distance       | -.01    | -.07~     | -.04~     | -.04    |
| <b>Emotional</b>                  |         |           |           |         |
| Homesickness                      | -.11*** | -.09      | -.11**    | .02     |
| <b>Controls</b>                   |         |           |           |         |
| Gender (men)                      | .18***  | .17*      | .01       | .16     |
| Age                               | -.01*** | -.02***   | -.01      | -.03*** |
| Level of education                | .03*    | .05*      | .03*      | -.00    |
| Reason of immigration: Study      | .05     | -.19~     | -.04      | -.03    |
| Reasons of immigration: Political | -.24**  | .19       | -.09      | -.50*   |
| Months since immigration          | -.000   | .002      | -.001     | -.000   |
| Number of respondents             | 1427    | 392       | 948       | 376     |
| Number of observations            | 2340    | 617       | 1747      | 653     |

\*\*\*  $p < .001$ ; \*\*  $p < .01$ ; \*  $p < .05$

Source: New Immigrant Survey – the Netherlands – 4 waves

## Appendix 2. Recent immigrants' health: fixed effects, by immigrant group

|                                 | Poles  | Bulgarian | Spaniards | Turks  |
|---------------------------------|--------|-----------|-----------|--------|
| <b>Economic</b>                 |        |           |           |        |
| Employed                        | -.01   | -.24~     | .03       | .11    |
| Been unemployed last year       | -.07   | .08       | .03       | .04    |
| Income                          |        |           |           |        |
| - Medium or high income         |        |           |           |        |
| - Low income                    | .07    | -.15~     | .12       | -.01   |
| - No information on income      | -.07   | -.10      | -.03      | -.05   |
| Fixed contract                  | -.05   | -.01      | -.08      | .00    |
| Irregular work                  | -.01   | .06       | .06~      | .02    |
| Hazardous work                  | -.03   | .06       | -.12*     | -.09   |
| Physical heavy work             | -.04   | .00       | .01       | -.24** |
| <b>Social</b>                   |        |           |           |        |
| Contact with co people          | -.02   | .01       | -.01      | .02    |
| Contact with Dutch              | .02    | .08**     | .01       | .03    |
| Relevant and close person in NL | -.11   | .17       | .06       | -.25   |
| Partner status                  |        |           |           |        |
| - No Partner (ref)              |        |           |           |        |
| - Partner in the household      | -.05   | -.14      | -.07      | .08    |
| - Partner outside the household | -.04   | -.21      | -.09      | -.10   |
| Children in the household       | -.13~  | .05       | -.02      | -.06   |
| Children under 18 in CO         | -.04   | .13       | -.00      | .68~   |
| <b>Cultural</b>                 |        |           |           |        |
| Perceived group discrimination  | -.10** | .05       | -.07*     | -.12*  |
| Perceived cultural distance     | -.00   | -.09*     | -.03      | .00    |
| <b>Emotional</b>                |        |           |           |        |
| Homesickness                    | -.06   | -.17*     | -.05      | .03    |
| Number of respondents           | 1427   | 392       | 948       | 376    |
| Number of observations          | 2340   | 617       | 1747      | 653    |

\*\*\*  $p < .001$ ; \*\*  $p < .01$ ; \*  $p < .05$

Source: New Immigrant Survey – the Netherlands – 4 waves
